# Supplementary material
Source: publisher figshare collection journal article supplement (https://sage.figshare.com/ndownloader/files/22896965)
Supplement: Supplementary file 1 [file 22896965]

## Appendix A

| No | Paper Title                                                                                                                                      | Primary author<br>(year of<br>publication) | Paper<br>type | Database | System<br>design                     | Learning<br>language | Educational level &<br>participant<br>characteristics | Evaluation<br>(bond texts mean<br>its main focus)                                                                                                 |
|----|--------------------------------------------------------------------------------------------------------------------------------------------------|--------------------------------------------|---------------|----------|--------------------------------------|----------------------|-------------------------------------------------------|---------------------------------------------------------------------------------------------------------------------------------------------------|
| 1  | Development of A Situational Interaction Game for Improving Preschool Children's Performance in English Performance Learning                     | Pu & Zhong (2018)                          | Conf.         | ACM DL   | Mobile AR game                       | English              | Preschool (L2)                                        | <ul style="list-style-type: none"> <li>• <b>Learning effectiveness</b></li> <li>• Affective outcomes</li> </ul>                                   |
| 2  | Block Talks: A Tangible and Augmented Reality Toolkit for Children to Learn Sentence Construction                                                | Fan et. al. (2018)                         | Conf. (WIP)   | ACM DL   | Mobile AR game                       | English              | Primary school (At-risk L1&L2)                        | X                                                                                                                                                 |
| 3  | From Tangible to Augmented: Designing a PhonoBlocks Reading System Using Everyday Technologies                                                   | Fan et. al. (2018)                         | Conf. (WIP)   | ACM DL   | Mobile AR game                       | English              | Primary school (At-risk L1 & L2)                      | X                                                                                                                                                 |
| 4  | Automatic Object Recognition in a Light-Weight Augmented Reality-based Vocabulary Learning Application for Children with Autism                  | Tang et al.(2019)                          | Conf.         | ACM DL   | Mobile AR app                        | English /Chinese     | Preschool children with autism (L2)                   | <ul style="list-style-type: none"> <li>• <b>Usability testing</b></li> <li>• Affective outcomes</li> </ul>                                        |
| 5  | Exploring the effect of materials designed with augmented reality on language learners' vocabulary learning                                      | Solak& Cakir (2015)                        | Journal       | Eric     | AR app                               | English              | Higher education (L2)                                 | <ul style="list-style-type: none"> <li>• <b>Learning effectiveness</b></li> <li>• Affective outcomes</li> </ul>                                   |
| 6  | The Influence of the Augmented Reality Application on Students' Performances in Ottoman Turkish Readings                                         | Özcan et al. (2017)                        | Journal       | Eric     | Mobile AR app                        | Ottoman Turkish      | Higher education (L1)                                 | <ul style="list-style-type: none"> <li>• <b>Learning effectiveness</b></li> <li>• Affective outcomes</li> </ul>                                   |
| 7  | The Effectiveness of Using Augmented Reality Apps in Teaching the English Alphabet to Kindergarten Children: A Case Study in the State of Kuwait | Safar et al. (2017)                        | Journal       | Eric     | Mobile AR apps (two commercial apps) | English              | Preschool (L2)                                        | <ul style="list-style-type: none"> <li>• <b>Learning effectiveness</b></li> </ul>                                                                 |
| 8  | Learning English with Augmented Reality: Do learning styles matter?                                                                              | Hsu (2017)                                 | Journal       | PsycInfo | Mobile AR games                      | English              | Primary school (L2)                                   | <ul style="list-style-type: none"> <li>• Usability testing</li> <li>• <b>Learning effectiveness</b></li> <li>• Others (learning style)</li> </ul> |
| 9  | To Activate English Learning: Listen and Speak in Real Life Context with an AR Featured U-Learning System                                        | Ho et al. (2017)                           | Journal       | PsycInfo | Mobile AR game                       | English /Chinese     | Higher education (L2)                                 | <ul style="list-style-type: none"> <li>• <b>Learning effectiveness</b></li> <li>• Others (cognitive styles, learning strategies)</li> </ul>       |
| 10 | Augmented Reality 3D Pop-up Children Book: Instructional Design for Hybrid Learning                                                              | Vate-U-Lan (2011)                          | Conf.         | IEEE     | AR book and game                     | English              | Primary school (L2)                                   | <ul style="list-style-type: none"> <li>• <b>Usability testing</b></li> <li>• Affective outcomes</li> </ul>                                        |
| 11 | An Augmented Reality 3D Pop-Up Book: the Development of a Multimedia Project for English Language Teaching                                       | Vate-U-Lan (2012)                          | Conf.         | IEEE     | AR book and game                     | English              | Primary school (L2)                                   | <ul style="list-style-type: none"> <li>• Usability testing</li> <li>• <b>Learning effectiveness</b></li> <li>• Affective outcomes</li> </ul>      |
| 12 | The Book of Ellie: An Interactive Book for Teaching the Alphabet to Children                                                                     | Papadaki et al. (2013)                     | Conf.         | IEEE     | AR book and game                     | Greek                | Primary school (L1)                                   | <ul style="list-style-type: none"> <li>• <b>Usability testing</b></li> </ul>                                                                      |
| 13 | The Convergence of Augmented Reality and Education                                                                                               | Vate-U-Lan (2013)                          | Conf.         | IEEE     | AR book and game                     | English              | Primary school (L2)                                   | <ul style="list-style-type: none"> <li>• <b>Learning effectiveness</b></li> <li>• Affective outcomes</li> </ul>                                   |
| 14 | Augmented Reality Digital Technologies (ARDT) for Foreign Language Teaching and Learning                                                         | Scrivner et al. (2016)                     | Conf.         | IEEE     | Mobile AR game                       | Spanish              | Higher education (L2)                                 | <ul style="list-style-type: none"> <li>• <b>Usability testing</b></li> </ul>                                                                      |

|    |                                                                                                                                     |                           |             |      |                 |                     |                           |                                                                                                                                                            |
|----|-------------------------------------------------------------------------------------------------------------------------------------|---------------------------|-------------|------|-----------------|---------------------|---------------------------|------------------------------------------------------------------------------------------------------------------------------------------------------------|
| 15 | ARbis Pictus: A Study of Vocabulary Learning with Augmented Reality                                                                 | Ibrahim et al. (2018)     | Journals    | IEEE | AR app          | Basque              | Higher education (L2)     | <ul style="list-style-type: none"> <li>• <b>Learning effectiveness</b></li> <li>• Affective outcomes</li> </ul>                                            |
| 16 | MOW: Augmented Reality Game to Learn Words in Different Languages                                                                   | Barreira J. et al. (2012) | Conf.       | IEEE | AR game         | English /Portuguese | Primary school (L2)       | <ul style="list-style-type: none"> <li>• <b>Learning effectiveness</b></li> <li>• Affective outcomes</li> </ul>                                            |
| 17 | TeachAR: An Interactive Augmented Reality Tool for Teaching Basic English to Non-Native Children                                    | Dalim et al.(2016)        | Conf. (WIP) | IEEE | AR app          | English             | Preschool (L2)            | <ul style="list-style-type: none"> <li>• <b>Usability testing</b></li> </ul>                                                                               |
| 18 | The Effects of Learning Style on Mobile Augmented-Reality-Facilitated English Vocabulary Learning                                   | Chen et al.(2015)         | Conf.       | IEEE | Mobile AR app   | English /Chinese    | Primary school (L2)       | <ul style="list-style-type: none"> <li>• <b>Learning effectiveness</b></li> <li>• Affective outcomes</li> <li>• <b>Others (learning styles)</b></li> </ul> |
| 19 | Speaky Notes Learn languages with augmented reality                                                                                 | Sorrentino et al. (2015)  | Conf.       | IEEE | Mobile AR app   | English /Italian    | Primary school (L2)       | X                                                                                                                                                          |
| 20 | Leihoo: A window to Augmented Reality in Early childhood education                                                                  | Amaia et al. (2016)       | Conf.       | IEEE | Mobile AR game  | English /Basque     | Preschool (L2)            | <ul style="list-style-type: none"> <li>• <b>Usability testing</b></li> </ul>                                                                               |
| 21 | ABC3D - Using An Augmented Reality Mobile Game to Enhance Literacy in Early Childhood                                               | Bhadra et al. (2016)      | Conf. (WIP) | IEEE | Mobile AR games | English             | Preschool (L1)            | X                                                                                                                                                          |
| 22 | Words Worth Learning - Augmented Literacy Content for ADHD Students                                                                 | Luna et al. (2018)        | Conf.       | IEEE | Mobile AR app   | English             | Primary school (ADHD &L2) | <ul style="list-style-type: none"> <li>• <b>Usability testing</b></li> </ul>                                                                               |
| 23 | Augmented Reality Enhanced Computer Aided Learning for Young Children                                                               | Ati et al. (2018)         | Conf.       | IEEE | Mobile AR game  | English             | Primary school (L1)       | <ul style="list-style-type: none"> <li>• <b>Usability testing</b></li> <li>• Learning effectiveness</li> </ul>                                             |
| 24 | Enhanced Interactive Learning using Augmented Reality                                                                               | Jawad et al. (2014)       | Conf.       | IEEE | Mobile AR app   | English /Urdu       | Preschool (L1)            | X                                                                                                                                                          |
| 25 | The Use of Augmented Reality Enhanced Flashcards for Arabic Vocabulary Acquisition                                                  | Zainuddin et al. (2016)   | Conf.       | IEEE | Mobile AR app   | Arabic              | Primary school (L2)       | <ul style="list-style-type: none"> <li>• <b>Affective outcomes</b></li> <li>• Learning effectiveness</li> </ul>                                            |
| 26 | Using Augmented Reality to Teach Kindergarten Students English Vocabulary                                                           | Lee et al. (2017)         | Conf.       | IEEE | Mobile AR game  | English             | Preschool (L2)            | <ul style="list-style-type: none"> <li>• Usability testing</li> <li>• Affective outcomes</li> <li>• <b>Learning effectiveness</b></li> </ul>               |
| 27 | An experience of the application of Augmented Reality to learn English in Infant Education                                          | Amaia et al. (2017)       | Conf.       | IEEE | Mobile AR game  | English             | Preschool (L2)            | <ul style="list-style-type: none"> <li>• <b>Learning effectiveness</b></li> <li>• Affective outcomes</li> </ul>                                            |
| 28 | Investigating students' perceived satisfaction, behavioral intention, and effectiveness of English learning using augmented reality | Chang et al. (2011)       | Conf.       | IEEE | Mobile AR game  | English             | Higher education (L2)     | <ul style="list-style-type: none"> <li>• Usability testing</li> <li>• Learning effectiveness</li> <li>• <b>Affective outcomes</b></li> </ul>               |
| 29 | Mobile-Based AR Application Helps to Promote EFL Children's Vocabulary Study                                                        | He et al. (2014)          | Conf.       | IEEE | Mobile AR game  | English             | Preschool (L2)            | <ul style="list-style-type: none"> <li>• <b>Learning effectiveness</b></li> <li>• Affective outcomes</li> </ul>                                            |
| 30 | Development of an English Words Learning System utilizes 3D Markers with Augmented Reality Technology                               | Zhenming et al. (2017)    | Conf. (WIP) | IEEE | Mobile AR game  | English             | Preschool (L2)            | X                                                                                                                                                          |
| 31 | Learning words using Augmented Reality                                                                                              | Juan et al. (2010)        | Conf.       | IEEE | Mobile AR game  | Spanish             | Preschool (L1)            | <ul style="list-style-type: none"> <li>• Usability testing</li> <li>• Learning effectiveness</li> <li>• <b>Affective outcomes</b></li> </ul>               |

|    |                                                                                                                                                              |                          |          |                |                                |                  |                                                |                                                                                                                                                                                                                                          |
|----|--------------------------------------------------------------------------------------------------------------------------------------------------------------|--------------------------|----------|----------------|--------------------------------|------------------|------------------------------------------------|------------------------------------------------------------------------------------------------------------------------------------------------------------------------------------------------------------------------------------------|
| 32 | Application of Augmented Reality for Early Childhood English Teaching                                                                                        | Chen et al. (2017)       | Conf.    | IEEE           | Mobile AR game                 | English          | Preschool (L2)                                 | <ul style="list-style-type: none"> <li>• <b>Learning effectiveness</b></li> <li>• Affective outcomes</li> </ul>                                                                                                                          |
| 33 | The Effects of Multi-Sensory Augmented Reality on Students' Motivation in English Language Learning                                                          | Vedadi et al. (2019)     | Conf.    | IEEE           | Mobile AR app                  | English          | Primary school (L2)                            | <ul style="list-style-type: none"> <li>• <b>Learning effectiveness</b></li> <li>• Affective outcomes</li> </ul>                                                                                                                          |
| 34 | In-Situ Labeling for Augmented Reality Language Learning                                                                                                     | Huynh et al. (2019)      | Conf.    | IEEE           | Mobile AR app                  | English          | Higher education (L2)                          | <ul style="list-style-type: none"> <li>• <b>Usability</b></li> </ul>                                                                                                                                                                     |
| 35 | Design and Implementation of Children's Games Based on Mixed Reality                                                                                         | Wang et al.(2019)        | Conf.    | IEEE           | Mobile AR game                 | English /Chinese | Primary school (L2)                            | X                                                                                                                                                                                                                                        |
| 36 | Investigating the Role of Augmented Reality Technology in the Language Classroom                                                                             | Solak& Cakir (2016)      | Journall | Web of Science | AR app                         | English          | Primary school (L2)                            | <ul style="list-style-type: none"> <li>• <b>Learning effectiveness</b></li> <li>• Others (gender)</li> </ul>                                                                                                                             |
| 37 | Study on Mobile Augmented Reality Adoption for Mayo Language Learning                                                                                        | Bojórquez et al. (2016)  | Journall | Web of Science | Mobile AR app                  | Mayo             | Higher education (L2)                          | <ul style="list-style-type: none"> <li>• <b>Usability testing</b></li> <li>• Affective outcomes</li> </ul>                                                                                                                               |
| 38 | A Development of Augmented Reality - supported Mobile Game based on Jolly Phonics Approach to Enhancing English Phonics Learning Performance of ESL Learners | Wongta et al. (2016)     | Conf.    | Web of Science | Mobile AR game                 | English          | Primary school (L2)                            | <ul style="list-style-type: none"> <li>• <b>Learning effectiveness</b></li> <li>• Affective outcomes</li> </ul>                                                                                                                          |
| 39 | Augmented Reality for Learning English: Achievement, Cognitive Load Levels of Students                                                                       | Kucuk et al. (2014)      | Journall | Web of Science | AR app                         | English          | Secondary school (L2)                          | <ul style="list-style-type: none"> <li>• <b>Learning effectiveness (cognitive load and achievement level)</b></li> <li>• Affective outcomes</li> <li>• Others (relationship between affective outcomes and learning outcomes)</li> </ul> |
| 40 | Exploring the Potential for Augmented Reality to Motivate English Vocabulary Learning in Chinese College Students                                            | Li et al. (2015)         | Journall | Web of Science | AR app (commercial app)        | English          | Higher education (L2)                          | <ul style="list-style-type: none"> <li>• <b>Affective outcomes</b></li> </ul>                                                                                                                                                            |
| 41 | Using Augmented Reality Flashcards to Learn Vocabulary in Early Childhood Education                                                                          | Chen and Chan (2019)     | Journall | Web of Science | AR game (commercial app)       | English          | Preschool (L2)                                 | <ul style="list-style-type: none"> <li>• <b>Learning effectiveness</b></li> <li>• Affective outcomes</li> </ul>                                                                                                                          |
| 42 | Augmented Reality Supporting Reading Skills of Students with Autism Spectrum Disorder                                                                        | Howorth et al. (2019)    | Journall | Web of Science | AR app (commercial app)        | English          | Primary school (ASD&L2)                        | X                                                                                                                                                                                                                                        |
| 43 | Integration of Augmented Reality in the Teaching of English as a Foreign Language in Early Childhood Education                                               | Redondo et al. (2019)    | Journall | Web of Science | Mobile AR app                  | English          | Preschool (L2)                                 | <ul style="list-style-type: none"> <li>• <b>Learning effectiveness</b></li> <li>• Affective outcomes</li> </ul>                                                                                                                          |
| 44 | Post-it notes: supporting teachers in authoring vocabulary game contents                                                                                     | Sorrentino et al. (2019) | Journall | Web of Science | Mobile AR game                 | English          | Primary school/Secondary/Higher education (L2) | <ul style="list-style-type: none"> <li>• <b>Usability testing</b></li> </ul>                                                                                                                                                             |
| 45 | The applications and effects of learning English through augmented reality: a case study of Pokemon Go                                                       | Wu et al.(2019)          | Journall | Web of Science | Mobile AR game(commercial app) | English          | Higher education (L2)                          | <ul style="list-style-type: none"> <li>• <b>Learning effectiveness</b></li> <li>• Affective outcomes</li> </ul>                                                                                                                          |
| 46 | Fun Learning with AR Alphabet Book for Preschool Children                                                                                                    | Rambli et al.(2013)      | Conf.    | Science Direct | Mobile AR game                 | English          | Preschool (L1)                                 | <ul style="list-style-type: none"> <li>• <b>Learning effectiveness</b></li> </ul>                                                                                                                                                        |

|    |                                                                                                                                                                 |                         |             |                |                 |                     |                       |                                                                                                                                              |
|----|-----------------------------------------------------------------------------------------------------------------------------------------------------------------|-------------------------|-------------|----------------|-----------------|---------------------|-----------------------|----------------------------------------------------------------------------------------------------------------------------------------------|
|    |                                                                                                                                                                 |                         |             |                |                 |                     |                       | <ul style="list-style-type: none"> <li>• Affective outcomes</li> </ul>                                                                       |
| 47 | Educational Mobile Application of Augmented Reality Based Markers to Improve the Learning of Vowel Usage and Numbers for Children of a Kindergarten in Trujillo | Cieza & Lujan (2018)    | Conf. (WIP) | Science Direct | Mobile AR game  | English             | Preschool (L1)        | <ul style="list-style-type: none"> <li>• <b>Usability testing</b></li> </ul>                                                                 |
| 48 | An Investigation of the Effects of Individual Differences on Mobile-Based Augmented Reality English Vocabulary Learning                                         | Sytwu & Wang (2016)     | Journal     | Springer       | Mobile AR app   | English /Chinese    | Primary school (L2)   | <ul style="list-style-type: none"> <li>• <b>Learning effectiveness</b></li> <li>• Affective outcomes</li> </ul>                              |
| 49 | Effects of gender and different augmented reality learning systems on English vocabulary learning of elementary school students                                 | Hsu (2017)              | Journal     | Springer       | Mobile AR games | English             | Primary school (L2)   | <ul style="list-style-type: none"> <li>• <b>Learning effectiveness</b></li> <li>• Affective outcomes</li> </ul>                              |
| 50 | Augmented reality as multimedia: the case for situated vocabulary learning                                                                                      | Santos et al. (2016)    | Journal     | Springer       | Mobile AR app   | German and Filipino | Higher education (L2) | <ul style="list-style-type: none"> <li>• Usability testing</li> <li>• <b>Learning effectiveness</b></li> <li>• Affective outcomes</li> </ul> |
| 51 | Using Augmented Reality Technology in Assisting English Learning for Primary School Students                                                                    | Boonbrahm et al. (2015) | Journal     | Others         | Mobile AR app   | English             | Primary school (L2)   | <ul style="list-style-type: none"> <li>• <b>Learning effectiveness</b></li> <li>• Affective outcomes</li> </ul>                              |
| 52 | The effect of Employing AR Interactive Approach on Students' English Preposition Learning Performance                                                           | Hsieh et al. (2014)     | Journal     | Others         | Mobile AR app   | English             | Secondary school (L2) | <ul style="list-style-type: none"> <li>• Learning effectiveness</li> <li>• <b>Affective outcomes</b></li> </ul>                              |
| 53 | The Use of Augmented Reality Pop-Up Book to Increase Motivation in English Language Learning For National Primary School                                        | Mahadzir & Phung (2013) | Journal     | Others         | AR app          | English             | Primary school (L2)   | <ul style="list-style-type: none"> <li>• <b>Affective outcomes</b></li> </ul>                                                                |
